# Supplementary material
Source: PubMed Central journal article supplement (PMC3251048)
Supplement: 1108963108_pnas.201108963SI.pdf [file 1108963108_pnas.201108963SI.pdf]

# Supporting Information

Stewart et al. 10.1073/pnas.1108963108

## SI Materials and Methods

**Bacterial Strains, Plasmids, and Culture Conditions.** Mutants were generated in the *Salmonella* typhimurium 14028 background as described previously (1). Strains can express only *fliC* flagellin because of the deletion of *fljBA* (2). To construct the *fliA* reporter, the *PfliA::gfp* fusion was cloned from pDW3 (3) using primers 5'-CCCGAGTGGCTGATTTTATTCTGCTC-3' and 5'-CGGGGCTTATTGTATAGTTCATCCA-3', ligated into pCR2.1, then digested out with BsoBI and EagI and ligated into pBR322. *pfliC* is pRP3, a pBR322 derivative in which *fliC* expression is driven from the native *fliC* promoter; this plasmid was a gift from Kelly Hughes (University of Utah, Salt Lake City, UT). To construct  $P_{araBAD}::ydiV$ , the *ydiV* gene was PCR-amplified from BC1662 using primers 5'-GAATTCATGGGACTGGCGTAA-TGATTG-3' and 5'-GAGCTCTTATCGCTGAACGAGTTTA-ATG-3'. The resulting fragment was cloned into pCR2.1, sequence-confirmed, digested out with EcoRI and SalI, and cloned into pJN105 (4). The *flhD-lacZ* single-copy chromosomal translational fusion was generated as described previously (5). Plasmid pCE40 was integrated into an in-frame FRT site generated using PKD13. The *STM4226/7::tetRA* construct was a gift from Joyce Karlinsey (University of Washington, Seattle, WA); the *tetRA* tetracycline resistance cassette is inserted 83 bp downstream of the *STM4226* stop codon.

**GFP Expression ex Vivo.** Bacteria living in the spleens of infected mice were recovered, analyzed, and enumerated as described previously (3). By this point in the colonization process, residual fluorescence from the input culture is diluted below the level of detection (3). Statistical significance was determined using the Student nonpaired two-sample two-tailed *t* test.

**Competitive Infections.** Tissues were collected into 2 mL of sterile PBS on ice and homogenized. Then Triton X-100 was added to a final concentration of 0.5% to lyse cells. Homogenates were serially diluted and plated to selective media to determine colonization by each of the two strains.

**Macrophages.** Bone marrow macrophages derived from C57BL/6 mice were harvested and cultured as described previously (6). Macrophages were replated 24 h before infection in antibiotic-free DMEM with 5% FBS. At 1 h before infection, the medium was aspirated and replaced.

**Immunoblot Analysis.** For IL-1 $\beta$  detection,  $2 \times 10^5$  bone marrow-derived macrophages were seeded per well of a 24-well plate and treated overnight with 100 ng/mL of LPS. At 1 h before the infection, macrophages were washed three times in PBS, and 5 mM glycine was added to the media (6). Bacteria were prepared as for cytotoxicity experiments. Macrophage culture supernatants were collected at indicated times, filtered for 2 min at 2,000 rpm using a 0.22- $\mu$ m SPIN-X centrifuge filter (Costar), concentrated for 50 min at  $20,800 \times g$  and 4 °C using a Microcon 10,000-MWCO filter (Amicon), combined with SDS/PAGE sample buffer to 1 $\times$ , and then stored at -20 °C. Macrophages were lysed in 25  $\mu$ L of 2 $\times$  SDS/PAGE sample buffer and then incubated for 10 min on ice; lysates were stored at -20 °C. Samples were thawed, boiled for 10 min, run on a 15% SDS/PAGE gel, and transferred to nitrocellulose overnight. Processed cytokine was detected using anti-IL-1 $\beta$  antibody (AF-401-NA; R&D Systems) and quantified using NIH ImageJ version 1.63.

**Serum Cytokine Quantitation.** Blood from infected C57BL/6 mice was collected by submandibular puncture into Microtainers (365967; BD Biosciences). Spleen homogenates were serially diluted and plated to determine colonization. The microtainers were stored for 1 h at 4 °C, then spun for 2 min at  $20,800 \times g$  to separate serum from other blood components. Serum was stored at -20 °C until analysis. Cytokine concentrations were measured on a FACSCanto flow cytometer (BD Biosciences) using the Mouse Inflammation Kit Cytometric Bead Array (552364) and the Mouse/Rat Soluble Protein Master Buffer Kit (558266) with the Mouse IL-1 $\beta$  Flex Set (560232).

**Identification of GGDEF and EAL Domain-Containing Proteins and Construction of Fig. S1.** *Salmonella* genes encoding GGDEF and EAL domains were identified using the Comprehensive Microbial Resource's TIGRFAM/Pfam search function. All hits were then used as starting points for individual homology searches using the Protein vs. All Alignment function of JCVI-CMR. Individual GGDEF and EAL domains were ranked for homology to the canonical sequence based on the bit score assigned by Pfam. Scores of <20 were classified as low, scores of 21–200 as medium, and scores of >200 as high. Protein domains were identified and mapped using the SMART database (<http://smart.embl-heidelberg.de/>).

1. Datsenko KA, Wanner BL (2000) One-step inactivation of chromosomal genes in *Escherichia coli* K-12 using PCR products. *Proc Natl Acad Sci USA* 97:6640–6645.
2. Bonifield HR, Hughes KT (2003) Flagellar phase variation in *Salmonella enterica* is mediated by a posttranscriptional control mechanism. *J Bacteriol* 185:3567–3574.
3. Cummings LA, Wilkerson WD, Bergsbaken T, Cookson BT (2006) In vivo, *fliC* expression by *Salmonella enterica* serovar Typhimurium is heterogeneous, regulated by ClpX, and anatomically restricted. *Mol Microbiol* 61:795–809.

4. Newman JR, Fuqua C (1999) Broad-host-range expression vectors that carry the L-arabinose-inducible *Escherichia coli* *araBAD* promoter and the *araC* regulator. *Gene* 227:197–203.
5. Ellermeier CD, Janakiraman A, Slauch JM (2002) Construction of targeted single copy *lac* fusions using  $\lambda$  Red and FLP-mediated site-specific recombination in bacteria. *Gene* 290:153–161.
6. Fink SL, Cookson BT (2006) Caspase-1-dependent pore formation during pyroptosis leads to osmotic lysis of infected host macrophages. *Cell Microbiol* 8:1812–1825.



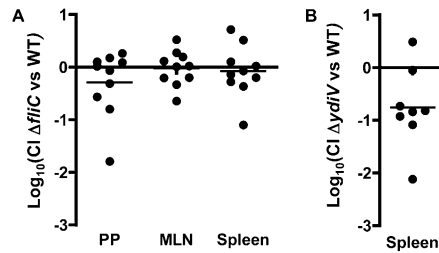

**Fig. 53.** (A) WT and  $\Delta fliC$  are equally fit in vivo. Mice were orally gavaged with  $10^6$  cfu of  $\Delta fliC$  (strain 1) and WT (strain 2), for a total of  $2 \times 10^6$  cfu/mouse. On day 5 after infection, the animals were killed, tissue colonization was measured, and the competitive indices (CI) were calculated as described in *Materials and Methods*. Because *fliC* is normally repressed at systemic sites of infection, deletion of flagellins provides no competitive advantage in the WT mouse background, where *fliC* is subject to appropriate regulation. The WT and  $\Delta fliC$  strains colonize equally well in all tissues analyzed ( $P = 0.1826$ ,  $0.8346$ , and  $0.6820$  for Peyer's patches, mesenteric lymph nodes, and spleens, respectively; one-sample  $t$  tests with hypothetical mean of 0). (B)  $\Delta ydiV$  is attenuated for growth in the spleen. Mice were orally gavaged with  $10^6$  cfu of  $\Delta ydiV$  (strain 1) and WT (strain 2), for a total of  $2 \times 10^6$  cfu/mouse. On day 6 after infection, the animals were killed, tissue colonization was measured, and the CIs were calculated as described in *Materials and Methods*. The average  $\text{log}_{10}(\text{CI})$  is  $-0.7588$  ( $P = 0.0258$ , one-sample  $t$  test with hypothetical mean of 0).

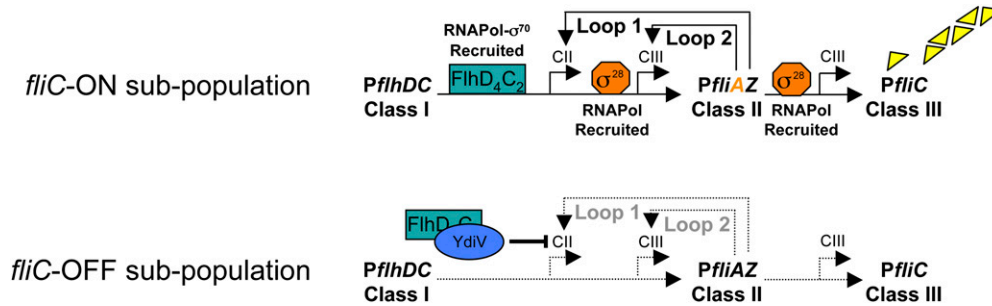

**Fig. 54.** *YdiV* controls bistable flagellar gene expression in *Salmonella*. (Upper) *fliA* is transcribed from both a class II promoter (CII) and a class III promoter (CIII), each of which is subject to a positive feedback loop.  $\text{FlhD}_4\text{C}_2$  initiates transcription of *fliA* by recruiting the RNA polymerase- $\sigma^{70}$  complex to the *fliA* CII promoter. The second gene in the *fliA* operon, *fliZ*, then posttranslationally increases the amount of  $\text{FlhD}_4\text{C}_2$  to complete loop 1. In the second positive feedback loop,  $\text{FlhA}$  ( $\sigma^{28}$ ) drives its own expression by recruiting RNA polymerase to the *fliA* CIII promoter. (Lower) *YdiV* prevents  $\text{FlhD}_4\text{C}_2$  from initiating transcription at class II promoters. Thus, *YdiV* acts upstream of the two *fliA* positive feedback loops to lock a subpopulation of cells in *fliA/fliC*-OFF mode.

**Table S1. Strains and plasmids used in this study**

| Strain no. or plasmid name          | Genotype or plasmid backbone vector                                                | Source                                                  |
|-------------------------------------|------------------------------------------------------------------------------------|---------------------------------------------------------|
| Strain                              |                                                                                    |                                                         |
| BC156                               | <i>Salmonella typhimurium</i> 14028                                                | American Type Culture Collection                        |
| BC1662                              | BC156 <i>fljBA</i> ::FRT                                                           | This study                                              |
| BC1642                              | BC1662 <i>STM1703</i> ::FRT                                                        | This study                                              |
| BC1643                              | BC1662 <i>ydiV</i> ::FRT                                                           | This study                                              |
| BC1644                              | BC1662 <i>STM2123</i> ::FRT                                                        | This study                                              |
| BC1645                              | BC1662 <i>STM3611</i> ::FRT                                                        | This study                                              |
| BC1646                              | BC1662 <i>STM2410</i> ::FRT                                                        | This study                                              |
| BC1647                              | BC1662 <i>PSLT032</i> ::FRT                                                        | This study                                              |
| BC1648                              | BC1662 <i>STM1827</i> ::FRT                                                        | This study                                              |
| BC1649                              | BC1662 <i>STM0343</i> ::FRT                                                        | This study                                              |
| BC1650                              | BC1662 <i>STM3615</i> ::FRT                                                        | This study                                              |
| BC1651                              | BC1662 <i>STM3388</i> ::FRT                                                        | This study                                              |
| BC1652                              | BC1662 <i>STM0468</i> ::FRT                                                        | This study                                              |
| BC1653                              | BC1662 <i>STM4264</i> ::FRT                                                        | This study                                              |
| BC1654                              | BC1662 <i>STM2503</i> ::FRT                                                        | This study                                              |
| BC1655                              | BC1662 <i>STM3375</i> ::FRT                                                        | This study                                              |
| BC1656                              | BC1662 <i>STM2215</i> ::FRT                                                        | This study                                              |
| BC1657                              | BC1662 <i>STM1987</i> ::FRT                                                        | This study                                              |
| BC1658                              | BC1662 <i>STM2672</i> ::FRT                                                        | This study                                              |
| BC1659                              | BC1662 <i>STM4551</i> ::FRT                                                        | This study                                              |
| BC1660                              | BC1662 <i>STM1283</i> ::FRT                                                        | This study                                              |
| BC1661                              | BC1662 <i>STM0385</i> ::FRT                                                        | This study                                              |
| BC1693                              | BC1662 <i>STM1697</i> ::FRT                                                        | This study                                              |
| BC1694                              | BC1662 <i>STM0551</i> ::FRT                                                        | This study                                              |
| BC2062                              | BC1662 <i>sipB</i> ::FRT                                                           | This study                                              |
| BC725                               | BC1662 pBR322 CarbR                                                                | This study                                              |
| BC1677                              | BC1643 pBR322 CarbR                                                                | This study                                              |
| BC726                               | BC1662 <i>fliC</i> ::FRT pBR322 CarbR                                              | This study                                              |
| BC1963                              | BC1662 <i>fliC</i> ::FRT pRP3 CarbR                                                | This study                                              |
| BC1846                              | BC1643 <i>fliC</i> ::FRT pBR322 CarbR                                              | This study                                              |
| BC1961                              | BC1643 <i>fliC</i> ::FRT pRP3 CarbR                                                | This study                                              |
| BC1964                              | BC1643 pKAS32:: <i>PfliC</i> :: <i>gfp</i> CarbR                                   | This study                                              |
| BC1965                              | BC1662 pKAS32:: <i>PfliC</i> :: <i>gfp</i> CarbR                                   | This study                                              |
| BC2333                              | BC1643 pParaBAD:: <i>ydiV</i> GentR                                                | This study                                              |
| BC1810                              | BC1662 pPflhD:: <i>gfp</i> CarbR                                                   | This study                                              |
| BC2847                              | BC1662 pPflIA:: <i>gfp</i> CarbR                                                   | This study                                              |
| BC1844                              | BC1643 pPflhD:: <i>gfp</i> CarbR                                                   | This study                                              |
| BC2848                              | BC1643 pPflIA:: <i>gfp</i> CarbR                                                   | This study                                              |
| BC2717                              | BC1662 <i>flhD</i> :: <i>lacZ</i> translational fusion KanR                        | This study                                              |
| BC2718                              | BC1643 <i>flhD</i> :: <i>lacZ</i> translational fusion KanR                        | This study                                              |
| BC2805                              | BC2717 <i>csrA</i> ::FCF <i>flhD</i> :: <i>lacZ</i> translational fusion CamR KanR | This study                                              |
| BC2264                              | BC1662 FlhC::3× FLAG KanR                                                          | This study                                              |
| BC2265                              | BC1643 FlhC::3× FLAG KanR                                                          | This study                                              |
| BC2238                              | 14028 <i>STM4226/7</i> :: <i>tetRA</i> TetR                                        | Joyce Karlinsey (University of Washington, Seattle, WA) |
| BC2647                              | BC1662 <i>fliC</i> ::FRT <i>STM4226/7</i> :: <i>tetRA</i> TetR                     | This study                                              |
| BC1743                              | BC1643 <i>fliC</i> ::FKF KanR                                                      | This study                                              |
| BC1640                              | BC156 <i>fljBA</i> ::FKF KanR                                                      | This study                                              |
| BC2243                              | BC1662 <i>STM4226/7</i> :: <i>tetRA</i> TetR                                       | This study                                              |
| BC1621                              | 14028 <i>ydiV</i> ::FRT <i>fljBA</i> ::FKF KanR                                    | This study                                              |
| Plasmids                            |                                                                                    |                                                         |
| <i>pfljC</i>                        | pRP3, a pBR322 derivative, CarbR                                                   | Kelly Hughes (University of Utah, Salt Lake City, UT)   |
| pParaBAD:: <i>ydiV</i>              | pJN105 derivative, CarbR                                                           | This study                                              |
| pKAS32:: <i>PfliC</i> :: <i>gfp</i> | pKAS32 derivative, CarbR                                                           | Cummings et al. (6)                                     |
| pPflIA:: <i>gfp</i>                 | pBR322 derivative, CarbR                                                           | This study                                              |
| pPflhDC:: <i>gfp</i>                | pBR322 derivative, CarbR                                                           | Cummings et al. (6)                                     |
